# Supplementary material for: Digital Executive Function App Performance among Post-Stroke Individuals: When Accessibility Makes a Difference
Source: Research Square preprint supplement (doi:10.21203/rs.3.rs-6637894/v1), 2025-06-10
Supplement: Supplementary file 1 [file ed500c70dd2d9d5ae2c58ad4.docx]

Table S: Performance differences in the applications between the research group (n=32) and the control group (n=32).

|  | |  | Control group (n=32) | Research group (n=32) |  |  |  | Control group (n=32) | Research group (n=32) |  | |
| --- | --- | --- | --- | --- | --- | --- | --- | --- | --- | --- | --- |
| **Effect Size (r)** | **p** | **U** | **Single-Page Layout without enlarged images**  **Median (IQR)** | | **Effect Size (r)** | **p** | **U** | **Multi-Page Layout and enlarged images**  **Median (IQR)** | |  | 4ITT |
| **0.457** | **<0.001**** | **239.5** | **94.5 (71.0-135.0)** | **168.0 (106.0-231.7)** | **0.583** | **<0.001**** | **164.5** | **92.5 (76.2-117.7)** | **212.0 (143.2- 343.2)** | Total completion time (s) |
| **0.319** | **0.011*, b** | **416.0** | **4.0 (4.0-4.0)** | **4.0 (4.0-4.0)** | 0.050 | 0.688 | 491.0 | 4.0 (4.0-4.0) | 4.0 (4.0-4.0) | Number of purchased items |
| **0.314** | **0.012*, b** | **346.0** | **4.0 (3.0-4.0)** | **3.0 (2.2-4.0)** | **0.475** | **<0.001**** | **254.5** | **4.0 (4.0-4.0)** | **2.5 (2.0-4.0)** | Number of correct purchased items |
| **0.254** | **0.042*, b** | **380.0** | **0.0 (0.0-1.0)** | **1.0 (0.0-1.0)** | **0.480** | **<0.001**** | **252.0** | **0.0 (0.0-0.0)** | **1.0 (0.0-2.0)** | Number of incorrect purchased items |
| **0.344** | **0.0059*** | **7.570 a** | **21 (65.6)** | **10 (31.2)** | **0.441** | **<0.001**** | **12.444 a** | **21 (65.6)** | **7 (21.8)** | Budget adherence - No. (%) |
| **0.345** | **0.0057*** | **327.0** | **0.0 (0.0.-104.5)** | **279.0 (0.0-465.2)** | **0.523** | **<0.001**** | **227.0** | **0.0 (0.0-0.0)** | **481.0 (0.0-1384.5)** | Inefficiency |
| 0.057 | 0.648 | 478.5 | 3.0 (1.2-4.0) | 3.0 (2.0-5.0) | **0.285** | **0.022*, b** | **343.5** | **3.0 (1.0-4.0)** | **4.0 (2.0-6.7)** | "Shopping list" clicks |
| 0.024 | 0.848 | 498.5 | 1.0 (1.0-2.0) | 1.0 (1.0-2.0) | 0.041 | 0.740 | 488.0 | 2.0 (1.2-3.0) | 2.0 (1.0-3.0) | Visits in shopping cart page |
| 0.022 | 0.856 | 498.5 | 5.0 (2.0-7.1) | 6.0 (2.0-8.0) | 0.081 | 0.513 | 463.5 | 4.4 (1.0-7.5) | 5.5 (2.0-8.0) | Difficulty (VAS) |
| **0.430** | **0.001*** | **259.5** | **9.5 (9.0-10.0)** | **8.0 (5.2-9.0)** | **0.410** | **0.001*** | **275.0** | **9.9 (9.0-10.0)** | **8.0 (5.0-9.7)** | Ease of use (VAS) |
| **Effect Size (r)** | **p** | **U** | **Without voiceover** | | **Effect Size (r)** | **p** | **U** | **With voiceover** | |  | MATOT |
| **0.608** | **<0.001**** | **149.5** | **135.0 (105.5-182.5)** | **236.0 (173.0-314.0)** | **0.667** | **<0.001**** | **114.5** | **126.0 (94.5- 167.7)** | **245.4 (187.2-313.5)** | Total completion time (s) |
| **0.642** | **<0.001**** | **129.5** | **12.0 (8.0-17.0)** | **29.5 (18.0-36.0)** | **0.324** | **0.009*** | **319.0** | **10.5 (7.2-15.0)** | **16.5 (10.0-24.7)** | Time to first action (s) |
| **0.422** | **0.001*** | **267.0** | **16.0 (8.5-16.0)** | **10.5 (7.2-13.7)** | 0.159 | 0.203 | 421.5 | 16.0 (8.0-16.0) | 13.0 (8.0-16.0) | Correctly sorted pills |
| 0.047 | 0.702 | 492.0 | 0.0 (0.0-0.0) | 0.0 (0.0-0.0) | 0.130 | 0.296 | 465.0 | 0.0 (0.0-0.0) | 0.0 (0.0-0.0) | Incorrectly sorted pills |
| 0.214 | 0.086 | 384.5 | 4.0 (1.5-6.5) | 6.5 (2.5-8.0) | 0.229 | 0.066 | 375.5 | 3.0 (0.6-6.5) | 5.5 (2.2-8.0) | Difficulty (VAS) |
| **0.451** | **<0.001**** | **246.5** | **9.5 (8.0-10.0)** | **7.0 (5.0-8.7)** | **0.518** | **<0.001**** | **212.5** | **9.7 (9.2-10.0)** | **7.0 (5.0-8.7)** | Ease of use (VAS) |
| **Effect Size (r)** | **p** | **U** | **Low contrast 4.5:1** | | **Effect Size (r)** | **p** | **U** | **High contrast 12:1** | |  | TMT |
| **0.748** | **<0.001**** | **66.5** | **44.0 (39.2-50.7)** | **104.0 (71.5-124.0)** | **0.681** | **<0.001**** | **99.5** | **40.0 (36.0-57.0)** | **104.5 (75.2-143.5)** | TMT-A total completion time (s) |
| **0.763** | **<0.001**** | **64.5** | **88.0 (74.2-108.7)** | **272.5 (148.2-339.2)** | **0.740** | **<0.001**** | **72.0** | **84.0 (67.0- 110.0)** | **288.0 (160.0-365.2)** | TMT-B total completion time (s) |
| **0.608** | **<0.001**** | **149.5** | **39.0 (31.2-57.7)** | **139.0 (59.0-210.5)** | **0.686** | **<0.001**** | **96.5** | **38.0 (23.0-51.0)** | **128.5 (72.2-211.2)** | TMT B-A (s) |
| 0.144 | 0.247 | 426.0 | 5.5 (2.1- 8.5) | 7.0 (5.0-8.0) | **0.396** | **0.002*** | **280.0** | **4.0 (1.1-5.5)** | **7.0 (5.0-8.0)** | Difficulty (VAS) |
| **0.353** | **0.005*** | **306.5** | **9.1 (7.6-10.0)** | **8.0 (6.0-8.0)** | **0.343** | **0.007*** | **313.0** | **9.7 (7.4-10.0)** | **7.5 (6.2-8.7)** | Ease of use (VAS) |
|  | *Significant level at p < .05, ** significant level at p < .001, a χ2, b non-significant following the Bonferroni correction.  4ITT Four-Item Tablet Test; MATOT Medicine Arrangement Test Occupational Therapy; TMT Trail Making Test; VAS Visual Analogue Scale | | | | | | | | | | |
